# Supplementary material
Source: PubMed Central journal article supplement (PMC4861079)
Supplement: NIHMS781987-supplement-Suppl.pdf [file NIHMS781987-supplement-Suppl.pdf]

**Mosquito C-type lectins maintain gut microbiome homeostasis**

Xiaojing Pang, Xiaoping Xiao, Yang Liu, Rudian Zhang, Jianying Liu, Qiyong Liu,  
Penghua Wang and Gong Cheng

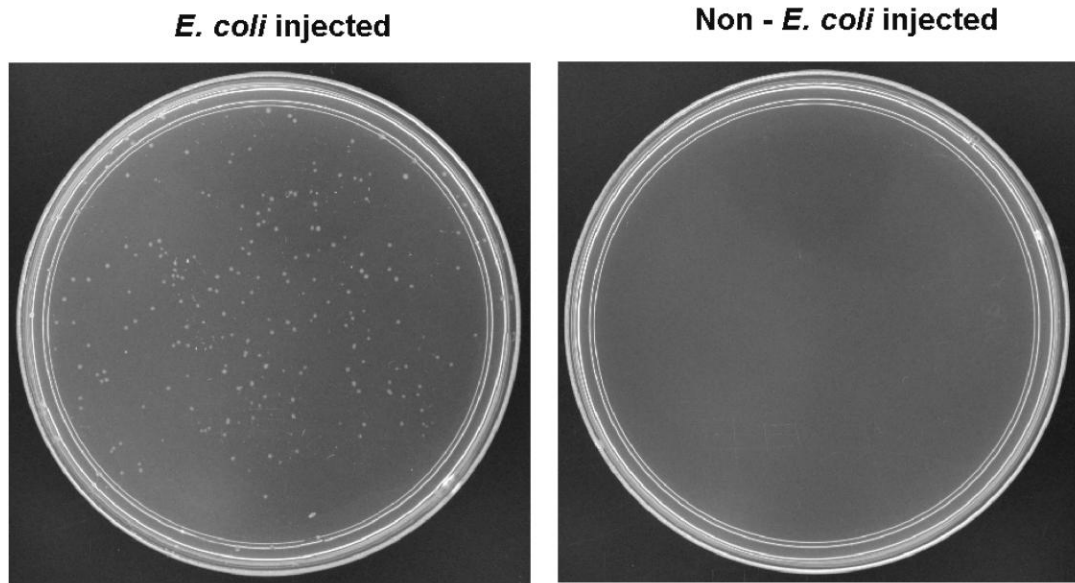

**Supplementary Figure 1. Detection of the spectinomycin-resistant commensal microbiome in *A. aegypti*.** Untreated mosquitoes were ground in PBS buffer. Then, bacterial viability was assessed by the CFU assay on LB plates with 100  $\mu\text{g}/\text{ml}$  spectinomycin. Mosquitoes inoculated with *E. coli* (ST515 strain) cells were used as the positive controls.

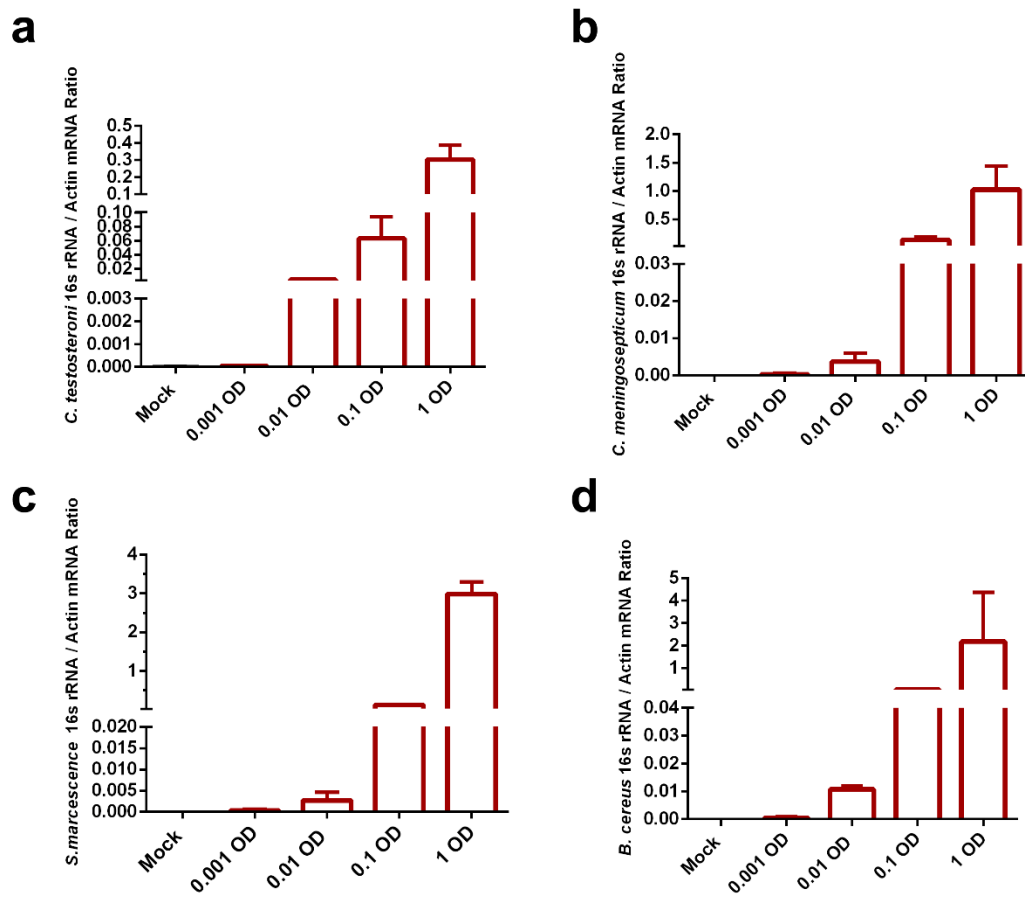

**Supplementary Figure 2. Validation of the specificity of qPCR primers for the 16S gene of gut bacteria.** *C. testosteroni* (a), *C. meningosepticum* (b), *S. marcescens* (c) and *B. cereus* (d), which were serially diluted by PBS buffer, were inoculated into antibiotic-treated mosquitoes, respectively. The total RNA from the antibiotic-treated and mock mosquitoes was isolated to synthesize cDNA, and subsequently the cDNA was used for the detection of the 16S gene of these bacteria. The primers for qPCR detection are described in Supplementary Table 5. Data are represented as mean  $\pm$ SD in each group.

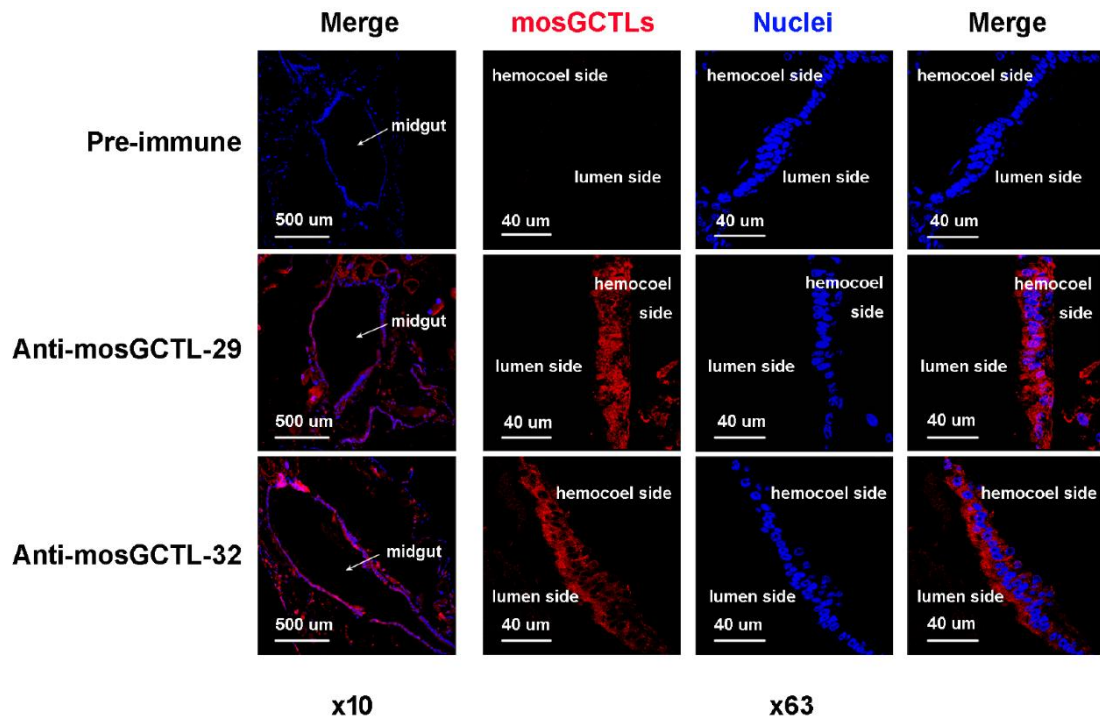

**Supplementary Figure 3. Detection of mosGCTLs in the mosquito midgut.** The female *A. aegypti* were cryo-sectioned, and slides were used for *in situ* staining. The anti-mosGCTL mouse polyclonal antibody and anti-mouse IgG Alexa-546 antibody were used for surface staining of the mosGCTL proteins (Red). Nuclei were stained blue with To-Pro-3 iodide. Images were examined using the 10 $\times$  and 63 $\times$  objective lens of a Zeiss LSM 780 meta confocal microscope.

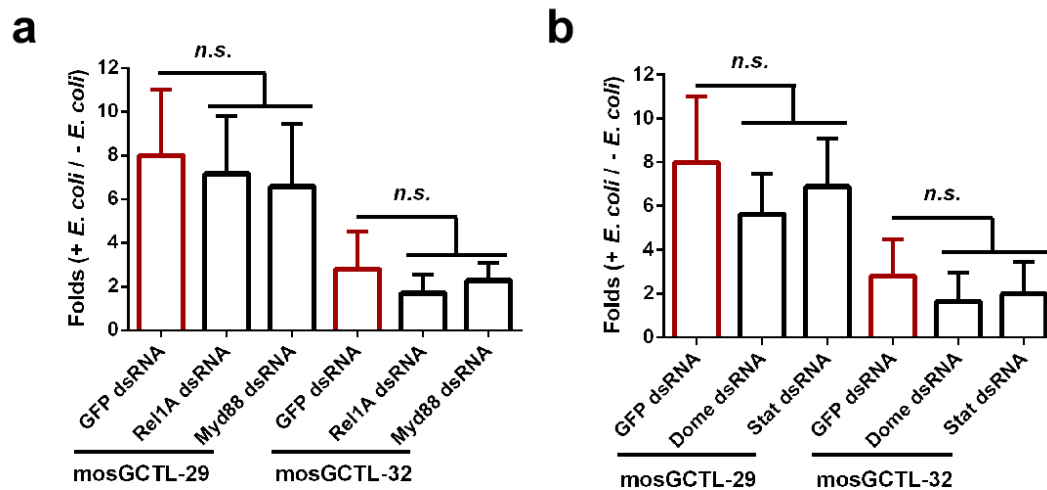

**Supplementary Figure 4.** The role of the Toll and JAK-STAT signaling pathways in *mosGCTL* induction. The key factors in the Toll (a, *Rel1A* and *Myd88*) and JAK-STAT (b, *Dome* and *Stat*) pathways were silenced in *A. aegypti*. 0.005 O.D. *E. coli* cells in PBS was sequentially microinjected 3 days later, and the *mosGCTL* induction was assessed 4 hr after bacterial inoculation. Mosquitoes inoculated with *GFP* dsRNA and subsequently infected with *E. coli* were included as controls. The induction is presented as the fold change relative to that in the uninfected mosquitoes. Data are represented as mean  $\pm$  SD in each group and analyzed using the non-parametric *Mann-Whitney* test.

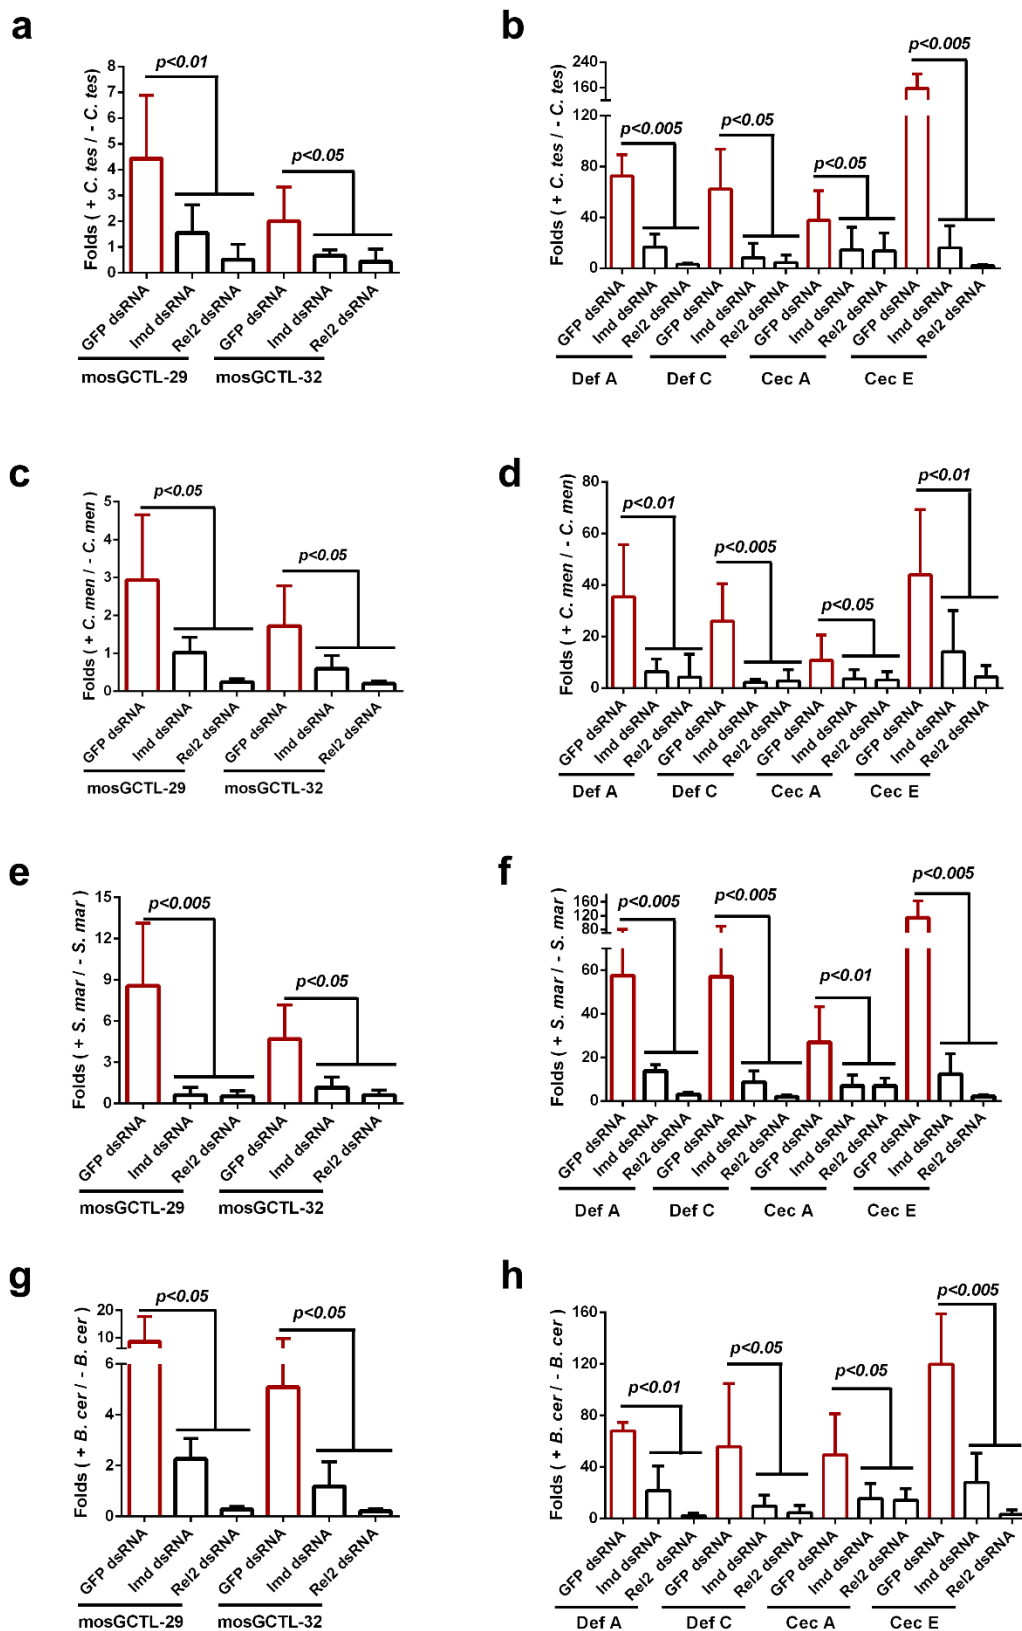

**Supplementary Figure 5. The role of the Imd pathway in *mosGCTLs*/AMPs induction.**

The key factors in the Imd pathway (*Imd* and *Rel2*) were silenced in *A. aegypti*. 0.05 O.D. of

*C. testosteroni* (*C. tes*) (a, b), *C. meningosepticum* (*C. men*) (c, d), *S. marcescens* (*S. mar*) (e, f) and *B. cereus* (*B. cer*) (g, h) in PBS was sequentially inoculated 3 days later, respectively, and the expression of inducible *mosGCTLs* (a, c, e, g) and *AMPs* (b, d, f, h) was assessed 4 hr after bacterial inoculation. Mosquitoes inoculated with *GFP* dsRNA and subsequently infected with bacteria were included as controls. qPCR analysis was normalized to *A. aegypti actin* (*AAEL011197*). The induction is presented as the fold change relative to that in the uninfected mosquitoes. The experiment was repeated 2 times with similar results. Data are represented as mean  $\pm$ SD in each group and analyzed using the non-parametric *Mann-Whitney* test.

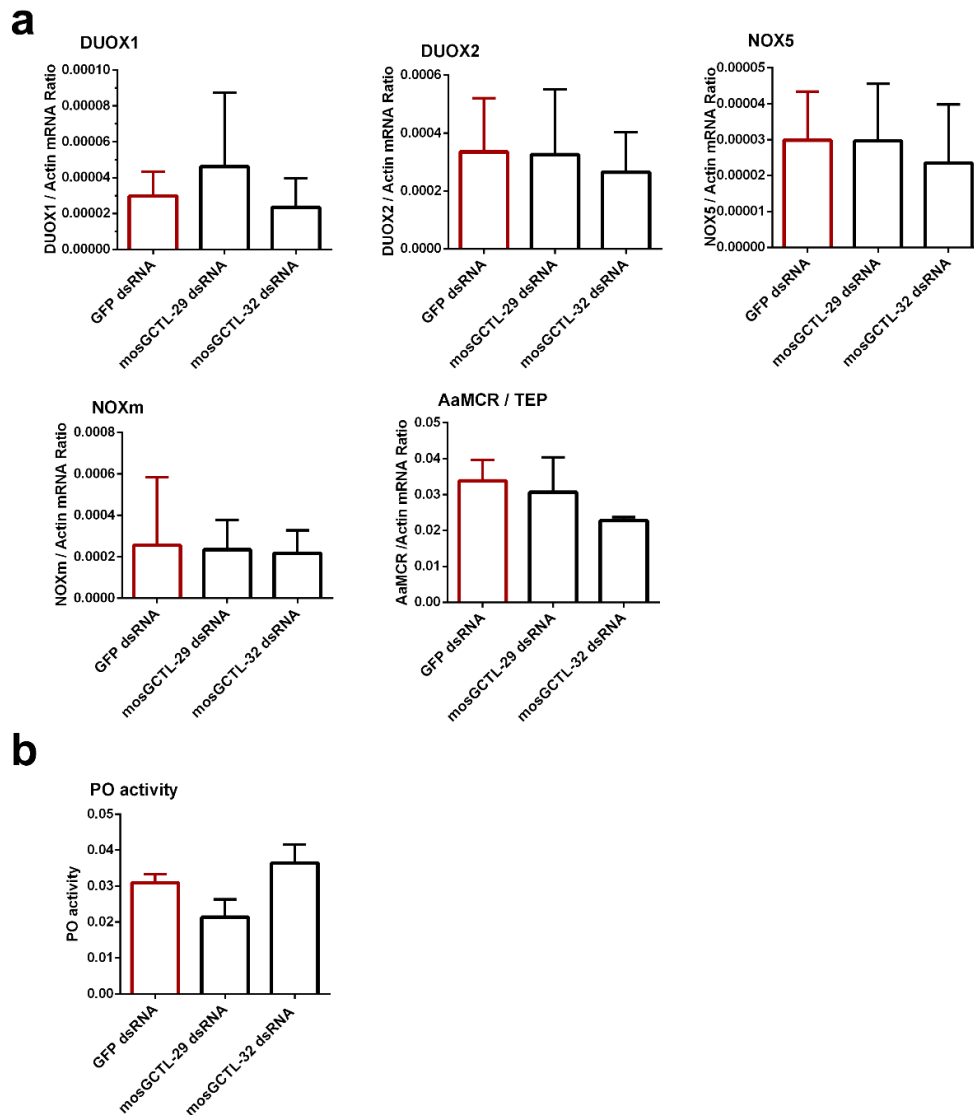

**Supplementary Figure 6. The role of *mosGCTLs* in the regulation of immune responses.**

**a**, Knockdown of *mosGCTL-29* and *mosGCTL-32* did not regulate the expression of the ROS-related *NADPH* oxidase and *TEP* genes. Gene expression was determined by SYBR Green<sup>®</sup> qPCR and normalized to *A. aegypti* actin. The qPCR primers are shown in Supplementary Table 5. **b**, Silencing *mosGCTL-29* and *mosGCTL-32* did not regulate the melanization activity in the mosquitoes. The mosquito lysates was collected by centrifugation at 3,000 rpm for 10 min at 4 °C to remove debris. The PO activity assays were performed in 96-well plates. Subsequently, 100  $\mu$ l of 50 mM sodium phosphate buffer (pH 6.5) containing 2 mM dopamine was added to 20  $\mu$ l of cell culture medium. PO activity was monitored over 30 min by measuring the absorbance at 490 nm using a plate reader. Data are represented as mean  $\pm$ SD in each group.



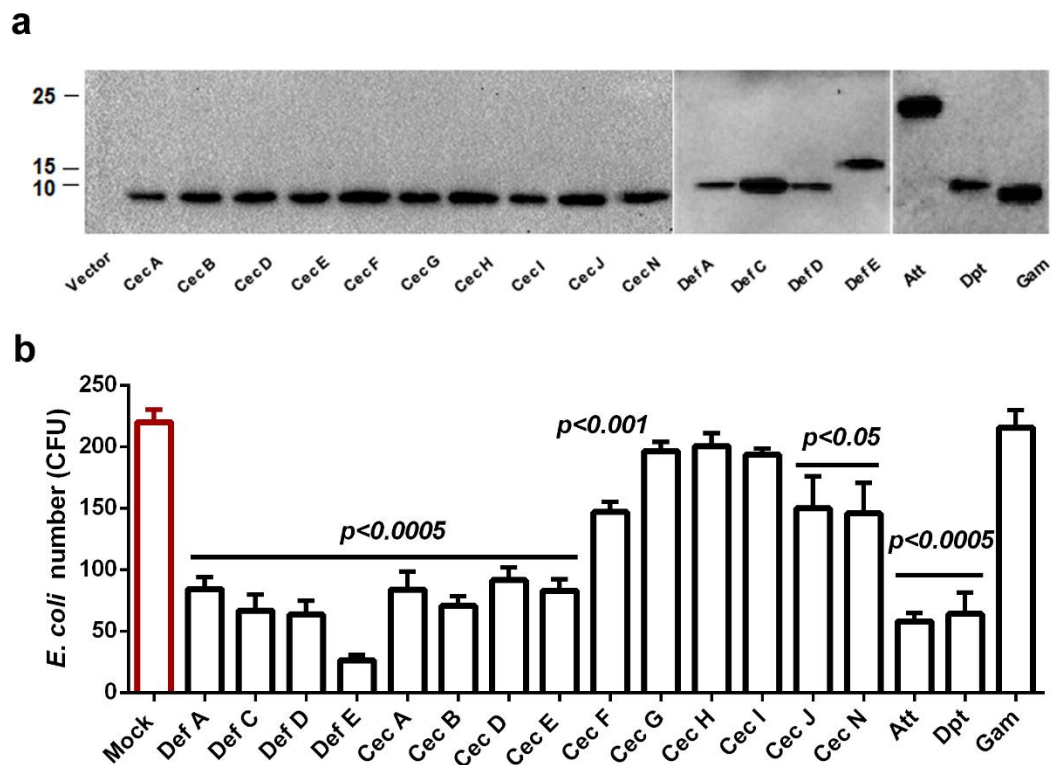

**Supplementary Figure 7. The role of AMPs in the elimination of *E. coli* cells. a,** The 17 *A. aegypti* AMP genes were cloned into the pMT/Bip/V5-His A vector and individually expressed in *Drosophila* S2 cells. The recombinant AMPs in the supernatant were detected via western blotting with an anti-V5 antibody. **b,** Detection of the anti-bacterial activity of AMPs. The supernatants with AMPs were individually mixed with the *E. coli* cells. After 1 hr of incubation, bacterial viability was assessed by a CFU assay. The experiment was repeated 3 times with similar results. Data are represented as mean  $\pm$ SD in each group and analyzed using the non-parametric *Mann-Whitney* test.

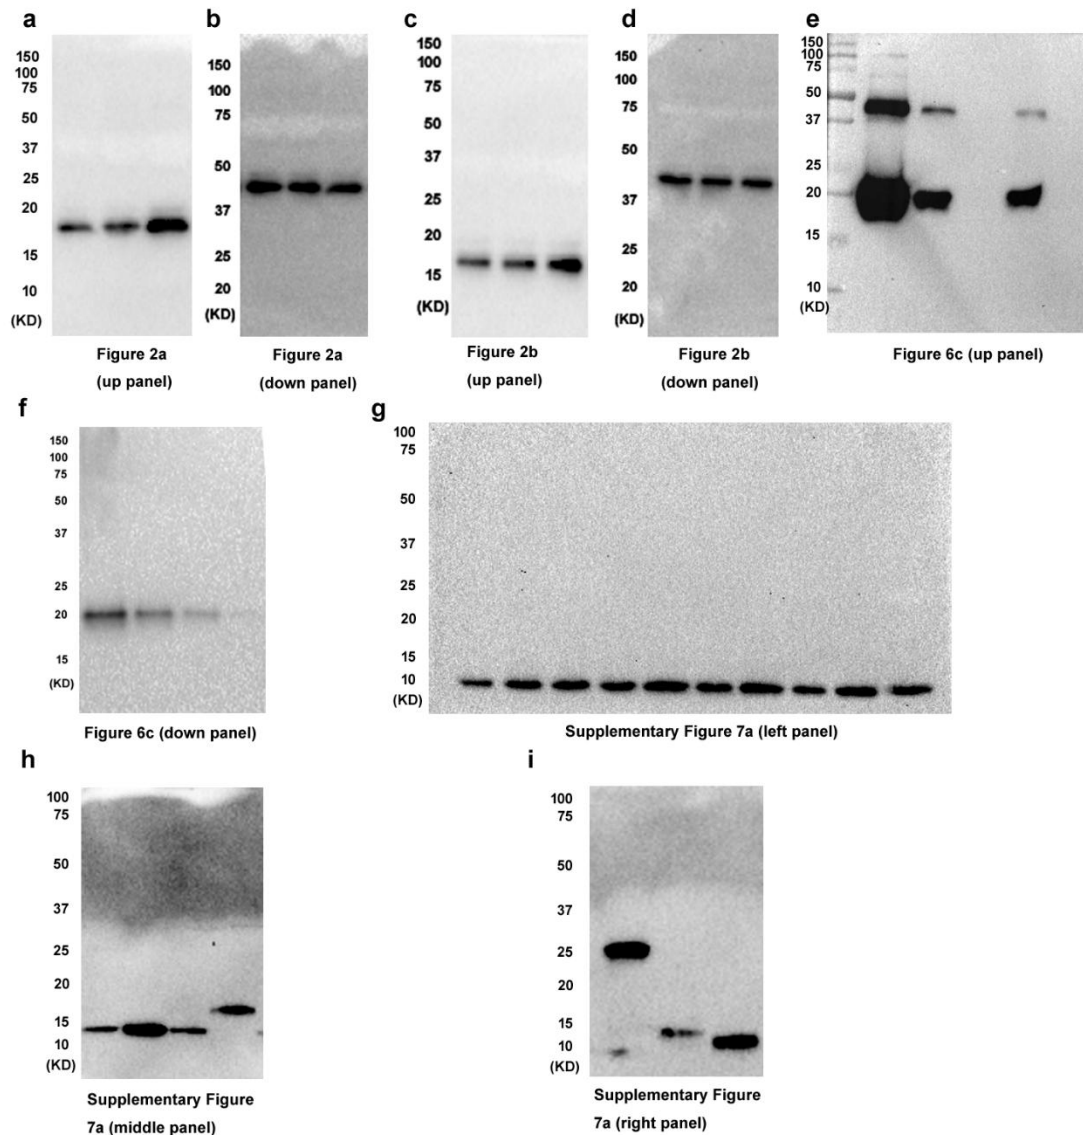

**Supplementary Figure 8. Full-length blots from Figures 2, 6 and Supplementary Figure 7. a-d,** The abundance of mosGCTL-29 and mosGCTL-32 in *A. aegypti*. **e,** The interaction between mosGCTL-32 and bacterial cells by elution assay. **f,** The interaction between mosGCTL-32 and bacterial cells by competitive assay. **g-i,** Expression of AMPs in *Drosophila* S2 cell supernatant. Molecular weight standards are shown on the left.

Supplementary Table 1. The 16S rDNA-based phylogenetic affiliation of culturable microorganisms from the *A. aegypti* midgut

| Bacterium                               | Gram staining | Percent in total sequenced microorganisms (%) |
|-----------------------------------------|---------------|-----------------------------------------------|
| <i>Alcaligenes sp.</i>                  | -             | 2.5                                           |
| <i>Acinetobacter sp.</i>                | -             | 2.5                                           |
| <i>Achromobacter sp.</i>                | -             | 2.5                                           |
| <i>Bacillus simplex</i>                 | +             | 2.5                                           |
| <i>Bacillus cereus</i>                  | +             | 7.5                                           |
| <i>Comamonas testosteroni</i>           | -             | 17.5                                          |
| <i>Chromobacterium aquaticum</i>        | -             | 5.0                                           |
| <i>Chryseobacterium meningosepticum</i> | -             | 12.5                                          |
| <i>Chryseobacterium sp.</i>             | -             | 7.5                                           |
| <i>Leucobacter sp.</i>                  | +             | 2.5                                           |
| <i>Pseudomonas protegens</i>            | -             | 5.0                                           |
| <i>Serratia marcescens</i>              | -             | 25.0                                          |
| <i>Sphingobium sp.</i>                  | -             | 2.5                                           |
| <i>Staphylococcus hominis</i>           | +             | 5.0                                           |

**Supplementary Table 2. *mosGCTL* orthologs in *Culex quinquefasciatus***

| <b><i>mosGCTL-29 (183AA)</i> orthologs in <i>Culex quinquefasciatus</i></b> |               |            |             |          |
|-----------------------------------------------------------------------------|---------------|------------|-------------|----------|
| Gene Number                                                                 | Name          | Length(AA) | Query cover | Identity |
| CPIJ000449                                                                  | C-type lectin | 160        | 69%         | 62%      |
| CPIJ015401                                                                  | C-type lectin | 116        | 61%         | 63%      |
| CPIJ006802                                                                  | C-type lectin | 186        | 72%         | 51%      |
| CPIJ006813                                                                  | C-type lectin | 172        | 92%         | 42%      |
| CPIJ006812                                                                  | C-type lectin | 172        | 92%         | 41%      |

  

| <b><i>mosGCTL-32 (159AA)</i> orthologs in <i>Culex quinquefasciatus</i></b> |               |            |             |          |
|-----------------------------------------------------------------------------|---------------|------------|-------------|----------|
| Gene Number                                                                 | Name          | Length(AA) | Query cover | Identity |
| CPIJ007869                                                                  | C-type lectin | 307        | 77%         | 55%      |
| CPIJ014105                                                                  | C-type lectin | 156        | 88%         | 37%      |
| CPIJ015095                                                                  | C-type lectin | 162        | 90%         | 34%      |
| CPIJ001323                                                                  | C-type lectin | 136        | 72%         | 38%      |
| CPIJ009922                                                                  | C-type lectin | 173        | 77%         | 32%      |

Supplementary Table 3. *mosGCTLs* expression after systemic bacterial challenge in *A. aegypti*

| Gene Symbol | Gene Number | <i>mosGCTLs</i> Regulation (Fold/Mock) post <i>E. coli</i> challenge | <i>mosGCTLs</i> Regulation (Fold/Mock) post <i>S. marcescens</i> challenge | <i>mosGCTLs</i> Regulation (Fold/Mock) post <i>C. testosteroni</i> challenge | <i>mosGCTLs</i> Regulation (Fold/Mock) post <i>C. meningosepticum</i> challenge | <i>mosGCTLs</i> Regulation (Fold/Mock) post <i>B. cereus</i> challenge |
|-------------|-------------|----------------------------------------------------------------------|----------------------------------------------------------------------------|------------------------------------------------------------------------------|---------------------------------------------------------------------------------|------------------------------------------------------------------------|
| mosGCTL-1   | AAEL000563  | 0.94                                                                 | 1.98                                                                       | 0.59                                                                         | 2.04                                                                            | 0.62                                                                   |
| mosGCTL-2   | AAEL000533  | 1.11                                                                 | 1.15                                                                       | 16.11                                                                        | 7.06                                                                            | 2.08                                                                   |
| mosGCTL-3   | AAEL000535  | 0.69                                                                 | 1.97                                                                       | 0.96                                                                         | 10.43                                                                           | 0.90                                                                   |
| mosGCTL-4   | AAEL000543  | 1.14                                                                 | 1.17                                                                       | 0.96                                                                         | 1.18                                                                            | 1.21                                                                   |
| mosGCTL-5   | AAEL000556  | 0.62                                                                 | 0.92                                                                       | 0.67                                                                         | 0.62                                                                            | 0.84                                                                   |
| mosGCTL-6   | AAEL000283  | N/A*                                                                 | N/A                                                                        | N/A                                                                          | N/A                                                                             | N/A                                                                    |
| mosGCTL-7   | AAEL002524  | 1.93                                                                 | 2.67                                                                       | 2.33                                                                         | 1.86                                                                            | 3.78                                                                   |
| mosGCTL-8   | AAEL004679  | 1.44                                                                 | 2.99                                                                       | 0.52                                                                         | 3.76                                                                            | 0.64                                                                   |
| mosGCTL-9   | AAEL005482  | 0.63                                                                 | 0.76                                                                       | 0.58                                                                         | 1.08                                                                            | 1.31                                                                   |
| mosGCTL-10  | AAEL005641  | 4.64                                                                 | 12.51                                                                      | 16.56                                                                        | 11.39                                                                           | 67.65                                                                  |
| mosGCTL-11  | AAEL006456  | N/A                                                                  | N/A                                                                        | N/A                                                                          | N/A                                                                             | N/A                                                                    |
| mosGCTL-12  | AAEL008299  | 1.04                                                                 | 1.24                                                                       | 0.52                                                                         | 4.56                                                                            | 1.27                                                                   |
| mosGCTL-13  | AAEL008681  | N/A                                                                  | N/A                                                                        | N/A                                                                          | N/A                                                                             | N/A                                                                    |
| mosGCTL-14  | AAEL009209  | 1.46                                                                 | 1.59                                                                       | 0.51                                                                         | 2.87                                                                            | 0.54                                                                   |
| mosGCTL-15  | AAEL010992  | 0.96                                                                 | 1.27                                                                       | 0.70                                                                         | 3.53                                                                            | 0.52                                                                   |
| mosGCTL-16  | AAEL011070  | 0.81                                                                 | 0.96                                                                       | 1.42                                                                         | 1.11                                                                            | 1.15                                                                   |
| mosGCTL-17  | AAEL011079  | N/A                                                                  | N/A                                                                        | N/A                                                                          | N/A                                                                             | N/A                                                                    |
| mosGCTL-18  | AAEL011402  | 1.30                                                                 | 0.49                                                                       | 0.72                                                                         | 3.78                                                                            | 0.58                                                                   |

|            |            |                                                |             |             |             |              |
|------------|------------|------------------------------------------------|-------------|-------------|-------------|--------------|
| mosGCTL-19 | AAEL011404 | 0.79                                           | 1.35        | 1.04        | <b>3.20</b> | 0.58         |
|            |            | <i>90.8% Nucleotide identity to AAEL011404</i> |             |             |             |              |
|            | AAEL011407 |                                                |             |             |             |              |
| mosGCTL-20 | AAEL011408 | 1.72                                           | 1.19        | 1.19        | 1.39        | 1.17         |
| mosGCTL-21 | AAEL011446 | N/A                                            | N/A         | N/A         | N/A         | N/A          |
| mosGCTL-22 | AAEL011453 | 0.70                                           | <b>2.12</b> | 1.83        | <b>2.03</b> | <b>4.92</b>  |
| mosGCTL-23 | AAEL011455 | 0.67                                           | 0.46        | 1.28        | 0.69        | 1.78         |
| mosGCTL-24 | AAEL011607 | <b>3.05</b>                                    | <b>5.05</b> | <b>3.51</b> | <b>4.53</b> | <b>3.56</b>  |
| mosGCTL-25 | AAEL011609 | N/A                                            | N/A         | N/A         | N/A         | N/A          |
| mosGCTL-26 | AAEL017265 | <b>2.26</b>                                    | <b>5.80</b> | 1.82        | <b>3.01</b> | <b>2.69</b>  |
| mosGCTL-27 | AAEL011612 | 0.72                                           | 0.79        | 0.85        | 1.55        | 0.53         |
| mosGCTL-28 | AAEL011616 | <b>2.79</b>                                    | <b>2.37</b> | 0.61        | <b>3.23</b> | 0.75         |
| mosGCTL-29 | AAEL011619 | <b>5.76</b>                                    | <b>9.48</b> | <b>5.78</b> | <b>6.96</b> | <b>13.83</b> |
| mosGCTL-30 | AAEL011621 | <b>2.01</b>                                    | <b>2.07</b> | 0.80        | <b>2.91</b> | 0.82         |
| mosGCTL-31 | AAEL011622 | <b>4.89</b>                                    | <b>7.97</b> | <b>3.39</b> | <b>3.20</b> | <b>3.36</b>  |
| mosGCTL-32 | AAEL012353 | <b>2.05</b>                                    | <b>2.89</b> | <b>2.98</b> | <b>3.78</b> | <b>2.93</b>  |
|            |            | <i>98.3% Nucleotide identity to AAEL011607</i> |             |             |             |              |
|            | AAEL014382 |                                                |             |             |             |              |
| mosGCTL-33 | AAEL014385 | 1.61                                           | <b>4.1</b>  | 1.03        | <b>2.35</b> | 0.65         |
|            |            | <i>98.9% Nucleotide identity to AAEL011619</i> |             |             |             |              |
|            | AAEL014390 |                                                |             |             |             |              |

\* N/A, gene not analyzed.

Red number represents the increased expression by more than 2 folds.

Supplementary Table 4. AMPs regulation by knockdown of *mosGCTL-29* and *mosGCTL-32* in *A. aegypti*

| Gene Symbol | Gene Number | Function   | Fold Regulation (Mean) in whole body |                         | Fold Regulation (Mean) in midgut |                         |
|-------------|-------------|------------|--------------------------------------|-------------------------|----------------------------------|-------------------------|
|             |             |            | <i>mosGCTL-29</i> dsRNA              | <i>mosGCTL-32</i> dsRNA | <i>mosGCTL-29</i> dsRNA          | <i>mosGCTL-32</i> dsRNA |
| Def-A       | AAEL003841  | Defensin   | 1.25                                 | 0.81                    | 1.44                             | 0.65                    |
| Def-C       | AAEL003832  | Defensin   | 1.00                                 | 0.64                    | 1.18                             | 1.15                    |
| Def-D       | AAEL003857  | Defensin   | 1.23                                 | 0.87                    | 1.13                             | 1.25                    |
| Def-E       | AAEL003849  | Defensin   | 1.48                                 | 1.38                    | 0.90                             | 0.97                    |
| Cec-A       | AAEL000627  | Cecropin   | 1.01                                 | 0.63                    | 1.74                             | 1.28                    |
| Cec-B       | AAEL004223  | Cecropin   | 1.20                                 | 0.85                    | 0.90                             | 1.14                    |
| Cec-D       | AAEL000598  | Cecropin   | 1.22                                 | 1.15                    | 0.89                             | 0.84                    |
| Cec-E       | AAEL000611  | Cecropin   | 1.37                                 | 1.27                    | 0.83                             | 1.05                    |
| Cec-F       | AAEL000625  | Cecropin   | 1.29                                 | 0.72                    | 0.76                             | 1.13                    |
| Cec-G       | AAEL015515  | Cecropin   | 0.92                                 | 1.29                    | 0.91                             | 1.61                    |
| Cec-H       | AAEL017211  | Cecropin   | 1.13                                 | 1.36                    | 1.22                             | 1.35                    |
| Cec-I       | AAEL000775  | Cecropin   | 0.86                                 | 1.21                    | 0.68                             | 0.81                    |
| Cec-J       | AAEL000777  | Cecropin   | 0.98                                 | 1.28                    | 1.18                             | 1.07                    |
| Cec-N       | AAEL000621  | Cecropin   | 1.06                                 | 1.14                    | 1.33                             | 1.27                    |
| Dpt         | AAEL004833  | Diptericin | 0.68                                 | 0.87                    | 0.83                             | 1.03                    |
| Gam         | AAEL004522  | Gambicin   | 0.98                                 | 1.23                    | 0.86                             | 1.44                    |
| Att         | AAEL003389  | Attacin    | 1.33                                 | 0.74                    | 1.05                             | 1.47                    |

**Supplementary Table 5. Primers for qPCR, dsRNA synthesis and genes cloning**

| The primers for RT-qPCR                      | Upper primer                                                                                                         | Lower primer                                                                                                          |
|----------------------------------------------|----------------------------------------------------------------------------------------------------------------------|-----------------------------------------------------------------------------------------------------------------------|
| <i>mosGCTL-29</i>                            | CAATGCTGGCGCAATGAAC                                                                                                  | GATTGGACTGACAGATTAC                                                                                                   |
| <i>mosGCTL-32</i>                            | TCGAGGCATCCGAATACTGC                                                                                                 | CGGCCTTGGCTCCTTTACT                                                                                                   |
| <i>CPU007869</i>                             | TATATCTCTAATGAGGCTGAACCTGG                                                                                           | GTGTTTTTCGAGCGTTCAGAACT                                                                                               |
| <i>C. pipiens pallens Actin</i>              | TACGAATCCCGCAGCGGA                                                                                                   | GATACCGCAGATTCCATA                                                                                                    |
| <i>lmd</i>                                   | TCGTCAAACCTGGTTTTCT                                                                                                  | TGGCGGAGTTGAAGTAAAG                                                                                                   |
| <i>Rel2</i>                                  | GTTCCCGGATTAGCTACTGTG                                                                                                | CCGTTCCGTTTGAATGAC                                                                                                    |
| <i>Myd88</i>                                 | CGTGATTGGCGAGGTTGTTTC                                                                                                | ATCCGCTCCAATGCTGTTTCC                                                                                                 |
| <i>Rel1A</i>                                 | GCACCCAACAGTTCCAGAATC                                                                                                | GAAGTGTGTTGTTGTTGCTG                                                                                                  |
| <i>Dome</i>                                  | AAACGGTGGCAAAATGAAC                                                                                                  | CATACAGCCGGCTTCTTCT                                                                                                   |
| <i>Stat</i>                                  | CACACAAAAGGACGAGCA                                                                                                   | TCCAGTCCCTAAAGCTCA                                                                                                    |
| <i>Bacteria Universal 16S rRNA</i>           | TCCTACGGGAGGCAGCAGT                                                                                                  | GGACTACGAGGTATCTAATCCTGTT                                                                                             |
| <i>C. testosteroni 16s rRNA</i>              | CGAAAAGCCTGGGGCTAATAT                                                                                                | CCATCTCTGGTAAGTTCCTGC                                                                                                 |
| <i>C. meningosepticum 16s rRNA</i>           | ACATGGTCACCACCTCGTGAGA                                                                                               | GTCCGATCCGTTGTTGTCATT                                                                                                 |
| <i>B. cereus 16s rRNA</i>                    | CGCCTCGTTGGATGACG                                                                                                    | GATATACATTCACTTACTAATACCC                                                                                             |
| <i>S.marcescens 16s rRNA</i>                 | TTGCTCTTAAACATCTGGAA                                                                                                 | TCACAACCCGAAGATGTTTCC                                                                                                 |
| <i>Defensin A</i>                            | CTATACGGCTGCCGTGGAG                                                                                                  | CAATGAGCAGCACAAAGCAGTATC                                                                                              |
| <i>Defensin C</i>                            | CTTTGTTGATGAATCCGGAG                                                                                                 | GAACCCACTCAGCAGATCGC                                                                                                  |
| <i>Cecropin A</i>                            | CAAAGTATTTCTCTGATCGCG                                                                                                | CTGCACCTTCAATTTCTTTCC                                                                                                 |
| <i>Cecropin E</i>                            | GAAAGCACTTCCGTAAGTACTG                                                                                               | GTTAGTATCACAAATCCCCCATG                                                                                               |
| <i>DUOX1</i>                                 | ATGCTGAGCCGAGAGAGATT                                                                                                 | TTTTCTCATCAGTCCAATCG                                                                                                  |
| <i>DUOX2</i>                                 | CGTGGCGAGTATTTAGT                                                                                                    | GCAAAATCATCAGCAACAC                                                                                                   |
| <i>NOX5</i>                                  | CCTGGACGACACATCTATC                                                                                                  | TGAAGTCTTTGCGTTGACC                                                                                                   |
| <i>NOXM</i>                                  | TCCACAATACGGTTTCGCTA                                                                                                 | GCCGTCACAGAAATTGTA                                                                                                    |
| <i>AaMCR/TEP</i>                             | TCCGTCGGTGCAGATTACAA                                                                                                 | TCTACGCCGTCACGGGAGATAC                                                                                                |
| <i>A.aegypti Actin</i>                       | GAACACCCAGCTCGCTGACA                                                                                                 | TGCGTCATCTCTCACGGTTAG                                                                                                 |
| The primers for double-strand RNA synthesis  | Upper primer                                                                                                         | Lower primer                                                                                                          |
| <i>dsRNA GFP</i>                             | TAATACGACTCACTATAGGGGTGAGCAAGGGCGAGGAG                                                                               | TAATACGACTCACTATAGGGCATGATATAGACGTTGTGGCTGTT                                                                          |
| <i>dsRNA mosGCTL-29</i>                      | TAATACGACTCACTATAGGGCCCAATTTGACGAGGATG                                                                               | TAATACGACTCACTATAGGGCCGATCTCAAGCAGTGTTC                                                                               |
| <i>dsRNA mosGCTL-32</i>                      | TAATACGACTCACTATAGGGTGCCTGGCCATAGTTGAT                                                                               | TAATACGACTCACTATAGGGAGCCGCTTTTCGTAGTTTTTC                                                                             |
| <i>dsRNA lmd</i>                             | TAATACGACTCACTATAGGGAAGGCTTCTACCAATGTAA                                                                              | TAATACGACTCACTATAGGGGCACAGTGTTTTAGACTTTC                                                                              |
| <i>dsRNA Rel2</i>                            | TAATACGACTCACTATAGGGCAAGATTGGTGTGCTGTG                                                                               | TAATACGACTCACTATAGGGCCAGCTCTCCAGAGATCTC                                                                               |
| <i>dsRNA Myd88</i>                           | TAATACGACTCACTATAGGGGGCGATTGGTGTGTTTAT                                                                               | TAATACGACTCACTATAGGGTTGAGCGCATGCTTAACATC                                                                              |
| <i>dsRNA Rel1A</i>                           | TAATACGACTCACTATAGGGGCACAATCTGGTCGGCAAG                                                                              | TAATACGACTCACTATAGGGGGTATGCTGGAATCCGGC                                                                                |
| <i>dsRNA Dome</i>                            | TAATACGACTCACTATAGGGCCATCTCCACCAGAACTT                                                                               | TAATACGACTCACTATAGGGCCGGTGGTGCATATAATC                                                                                |
| <i>dsRNA Stat</i>                            | TAATACGACTCACTATAGGGTGGAAATACCAAGGACCAAT                                                                             | TAATACGACTCACTATAGGGTGCACAACTGCAAACTTGA                                                                               |
| <i>dsRNA CPU000449</i>                       | TAATACGACTCACTATAGGGGGCGCATCTCCGATAAACGC                                                                             | TAATACGACTCACTATAGGGCGCCCAATCTCCATGCAATC                                                                              |
| <i>dsRNA CPU015401</i>                       | TAATACGACTCACTATAGGGATGGAAGCTGGAGACGT                                                                                | TAATACGACTCACTATAGGGGTGCTTCCACCACAAGGT                                                                                |
| <i>dsRNA CPU006802</i>                       | TAATACGACTCACTATAGGGTGTCTCCAACTCGCTCTT                                                                               | TAATACGACTCACTATAGGGGTGCTAATCCACACAAGTG                                                                               |
| <i>dsRNA CPU006813</i>                       | TAATACGACTCACTATAGGGGCACTCGTCCCTTACCATT                                                                              | TAATACGACTCACTATAGGGTGTCAATCCAACTGTTCCA                                                                               |
| <i>dsRNA CPU006812</i>                       | TAATACGACTCACTATAGGGCTCGCTCTCCGGACTCAAC                                                                              | TAATACGACTCACTATAGGGTGTGCTCCGTAATTTGTT                                                                                |
| <i>dsRNA CPU007869</i>                       | TAATACGACTCACTATAGGGTCTACCAAGTCAACTGG                                                                                | TAATACGACTCACTATAGGGTACAGCTTGTATCACACGG                                                                               |
| <i>dsRNA CPU014105</i>                       | TAATACGACTCACTATAGGGCGCTCGAGTACTGCACCTAC                                                                             | TAATACGACTCACTATAGGGTACTGTTGCAAGTGTGATC                                                                               |
| <i>dsRNA CPU015095</i>                       | TAATACGACTCACTATAGGGCAGGCAAACTGGCATGGA                                                                               | TAATACGACTCACTATAGGGTGCACCCGGGGCAGTGTATGA                                                                             |
| <i>dsRNA CPU001323</i>                       | TAATACGACTCACTATAGGGTTTCTGATTGTGGCTGCGT                                                                              | TAATACGACTCACTATAGGGCAGCTCGATCATTCCAGTG                                                                               |
| <i>dsRNA CPU009922</i>                       | TAATACGACTCACTATAGGGTGTGTCGCCCATAGTAC                                                                                | TAATACGACTCACTATAGGGTGTGTTGCTCAGCAA                                                                                   |
| The primers for cloning into pMT/BIPV5-His/A | Upper primer                                                                                                         | Lower primer                                                                                                          |
| <i>mosGCTL-29 (V5 tag in C-terminal)</i>     | CCGGAATTCCTCCCAATTTGACGAG                                                                                            | GCTCTAGACGACCAGATTGGACTGAC                                                                                            |
| <i>mosGCTL-32 (V5 tag in C-terminal)</i>     | CCGGAATTCCTCCCAATTTGACGAG                                                                                            | GCTCTAGAAAACCTTGTGATGCAAGC                                                                                            |
| <i>Defensin A</i>                            | CCCTCAAGATCTGCCACCCACAGAACCGGTGCTGG                                                                                  | CCCTCATCTAGAATCCGGCAGACGACACCTCTTGGAG                                                                                 |
| <i>Defensin C</i>                            | CGAAGATCTCTCCACAGAGAACTGGCCG                                                                                         | CAGACTCGAGATTCGACAACGCAAACTTTTTTC                                                                                     |
| <i>Defensin D</i>                            | CGAAGATCTGCCTACCCACAGGAACCGG                                                                                         | CAGACTCGAGATTCGGCAGACGACACCC                                                                                          |
| <i>Defensin E</i>                            | GCCACAGATCTGCCCCACAGAGAGTGT                                                                                          | GCCACCTCTAGATGTGCCGAGACGACACTCTTGA                                                                                    |
| <i>Cecropin A</i>                            | GATCTGGTGGCTTAAAGAGCTGGGAAAGAAATTTGAAAGTGCAGAAA<br>ACGAGTTTTCAATGCGCCGAGAGAGGCTCTCCAGTTGAGCTGGGGCT<br>AAAGCTCTAT     | CTAGATAGAGCTTTAGCCCGAGCTACAACCTGGAAGGCTTCTCGCGG<br>CATTGAAAACCTGTTTCTGACACTTCCAAATTTCTTTCCAGCTCTTA<br>AGGCCACCA       |
| <i>Cecropin B</i>                            | GATCTGGTGGCTTAAAGAGCTGGGAAAGAAATTTGAAAGTGCAGAAA<br>GCCTGTCTTCAATGCGCCGAGAGAGGACTACCGTTGAGCTGGCAT<br>CAAGSACTGGAGAT   | CTAGATCTTCCAGTCCCTTGTGCGAGCTGCAACGGGTAGTCCCTTCT<br>GGCCGCGATTGAAGACAGCTTGGCCGGCCCTTCAATCTTTTTCCAG<br>GTTTCTCACCCGACCA |
| <i>Cecropin D</i>                            | GATCTGGTGGCTTAAAGAGCTGGGAAAGAAATTTGAAAGTGCAGAAA<br>CGAGATTTCAAGGCTTCGGAAGGCTCTCCCGTTGTTGAGGAATA<br>AAAGCATTGGAATAA   | CTAGATTTTCAATCCCTTATTCACACAAACCGGAGAGCTTTTTC<br>CGAAGCTTGAATCTCGCTTGGCCGCTCTTCCAAATTTCTTTCCAGC<br>TTCTTCCAGCCACCA     |
| <i>Cecropin E</i>                            | GATCTGGTGGCTTAAAGAGCTGGGAAAGAAATTTGAAAGTGCAGAAA<br>ACGCTGATTCAGGCTCTGAGAAAGCACTCCCGTAGTAAGTGGTTACA<br>AAGCCATAGGAAAT | CTAGATTTTCTATGGCTTGTAAACCACTACTACGGGAAGTGGTTTCT<br>AGAGCTTTGAATACAGCTTTCCGACTCTTCAATTTCTTTCCAGCT<br>TCTTCCAGCCACCA    |



|                                                      |                                                                                                                                          |                                                                                                                                           |
|------------------------------------------------------|------------------------------------------------------------------------------------------------------------------------------------------|-------------------------------------------------------------------------------------------------------------------------------------------|
| <i>Cecepripin F</i>                                  | GATCTGGTGGCCGAAGAAGCTGGGAAAGAAATGGAAAGGAGTCGGCAA<br>GCGAGTGTCAAAGCATCGGAAAAAGCCCTCCAGTTATAACGGGATAC<br>AAGGCTGTGGAAAGT                   | CTAGACTTCCAACAGCCTGTATCCCGTTATACTGGAAGGGCTTTTC<br>CGATGCTTTGAACACTCGCTTGCCGACTCCTCCAATTTCTTCCCAGC<br>TTCCTCAGGCCACCA                      |
| <i>Cecepripin G</i>                                  | GATCTGGTGGCCGAAGAAGCTGGGAAAGAAATGGGAGGTGCAGGAAA<br>ACGAGTTTCAATGCTGCCGAGAAGGCTCTTCTGTTGAGCTGGGGCT<br>AAAGCTGTGGAAAGT                     | CTAGACTTCTAGAGCTTTAGCCCCAGCTACAACAGGAAGAGCCTCT<br>CGGCAGCATGAAAACTGGTTTTCTGCACTCCCAATTTCTTCCCAG<br>CTTTGAGGCCACCA                         |
| <i>Cecepripin H</i>                                  | GATCTGGAAAGCTGANGAAGATTGGCAAAAAGTTGAAAAGCGGGCAA<br>CACGTCCGCAATGCAGCTCAAAGGCTGACCTGTCTGCGCTGGCCTG<br>GCGGCTCTGGTTT                       | CTAGAAACCAGAGCCGCCAGCCAGCAGCAGCAGTCCAGCCTTTGA<br>GCTGCATTGGCAGCTGTTGCCCGTCTTTCAACTTTTGGCAATCT<br>TCTCAGCTTTCCA                            |
| <i>Cecepripin I</i>                                  | GATCTGGAAGCTGAAGAAGTTGGCAAAAAGATAGAAAAGCTGGCAA<br>AACSTAGTCCATGCTGCGATAAGGTGATACCAACTGTCTAGGTTA                                          | CTAGAGTTTTATCTTTGTTGTTCTGCTGTTTTACGGATTTGTTGAACC<br>TAGGACAGTTGGTATCACTTATCGACAGCATGGACTACGTTTTTGCC                                       |
| <i>Cecepripin J</i>                                  | GATCTGGAAAGTTGAAGAAGCTGGGCAAAAAGATTGAAAAGCTGGCAA<br>CACGTGGTCCACGCTGTCGATAAGGTGATACCAACTGTCTGGGTTA                                       | CTAGAGTTTTATCTTTGTTGTTTTCAATTTACAGGATTTTTGTAATCC<br>AGGACAGTTGGTATCACCTTATCGACAGCGTGAACACGTTTTGCC                                         |
| <i>Cecepripin N</i>                                  | GATCTCAGCAACAGTGGCGCTGGAAAGCGGCCAGGTGGAATTCG<br>GCAAGAAATTGGAAAAGTCCGGAAAATGTGTTTAAAGCTGCTAAGAA<br>GCACTGCCAGTCTTTGCGGGGTACAAGGCCCTAGGAC | TGAGTCTAGGGCCTTTGACCCGGCAACGACTGGCAGTGCCTTCTTA<br>GCAGCGTTAAACACATTTTTCCGACTTTTTCCAAATTTCTTGGCAATTT<br>CCACTGGGGCGCCCTCCACCGCGACTGTTGCTGA |
| <i>Atacin</i>                                        | CCCTCAGATCTCAACTCCATGTTCTGCTCACTCCAGGTAAC                                                                                                | CCCTCATCTAGAGAAGCGATGACTCAGTCCAAACCCGGC                                                                                                   |
| <i>Diptericin</i>                                    | GCCACCAAGTCTGCATGTGGACCAATTGAC                                                                                                           | GCCACCTCTAGAGTGTGTGTGTAAGTGT                                                                                                              |
| <i>Gambicin</i>                                      | CCCTCAGAAATCCGCCACCTGGCTTTGGTGTGTTTATGT                                                                                                  | CCCTCAGGGCCCGCGCCCTGATTCCGATGATGACATTGGTGA                                                                                                |
| <b>The primers for cloning into pET28</b>            | <b>Upper primer</b>                                                                                                                      | <b>Lower primer</b>                                                                                                                       |
| <i>mosGCTL-29 (His tag in both N and C-terminal)</i> | CGCCTAGCTAGTCCCAATTGTTGACGAG                                                                                                             | TATCCGCTCGAGCACCAGATTGACTGAC                                                                                                              |
| <i>mosGCTL-32 (His tag in both N and C-terminal)</i> | CGCCTAGCTAGCAATCCAAGTATCAAT                                                                                                              | TATCCGCTCGAGAACTCTTGATGC                                                                                                                  |
| <b>The primers for PCR</b>                           | <b>Upper primer</b>                                                                                                                      | <b>Lower primer</b>                                                                                                                       |
| <i>Bacteria Universal 16s rDNA</i>                   | AGAGTTTATCCTGGCTCAG                                                                                                                      | TACGGYACGCTTGTACGACTT                                                                                                                     |
